# Supplementary material for: Nanoscale plasmonic TM-pass polarizer integrated on silicon photonics
Source: Royal Society of Chemistry journal article supplement (doi:10.1039/c9nr06948h), 2019-01-01
Supplement: c9nr06948h1.pdf [file c9nr06948h1.pdf]

## Supplementary information

### Nanoscale plasmonic TM-pass polarizer integrated on silicon photonics

Binbin Wang, Sylvain Blaize, and Rafael Salas-Montiel

#### Influence of the size parameters of the metallic nanoparticles on the transmission spectra

To show the influence of the parameters of the metallic nanoparticles on the transmission spectra, we plotted simulated transmission spectra under  $TE_0$  mode illumination with different  $d_1$  and  $d_2$  (Fig. A). As shown in Fig. A (b), the transmission spectra present nearly linear red-shift with the increase of nanorod length  $d_1$ . Indeed,  $d_1$  controls the position of plasmonic resonance. In Fig. A (a), higher extinction ratio is obtained with narrower nano-rod.

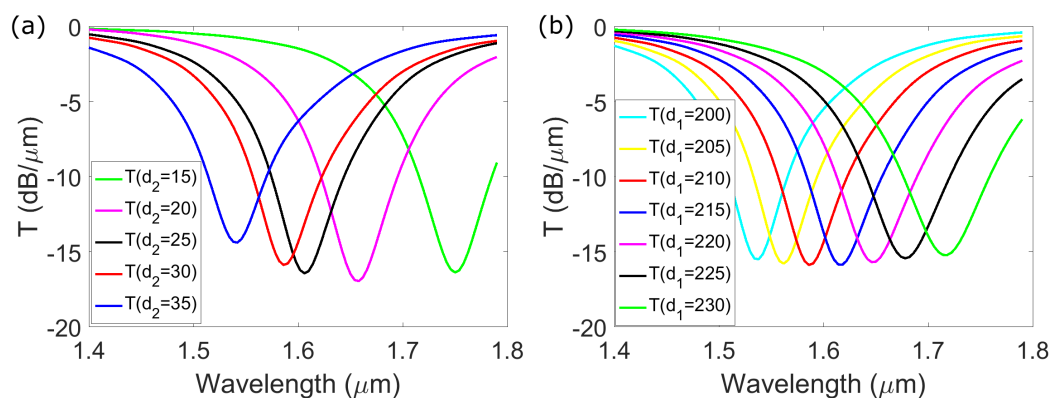

Fig. A Transmission spectra of proposed polarizer under  $TE_0$  mode illumination with different  $d_2$  (a) and different  $d_1$  (b).  $d_1 = 210$  nm in (a) and  $d_2 = 30$  nm in (b).
